# Supplementary material
Source: publisher figshare collection journal article supplement (https://acs.figshare.com/ndownloader/files/4265869)

## Supporting Information

**Figure S1.** Optimized structures for the CO<sub>2</sub> molecules adsorbed on the (a) hexagon, (b) pentagon, and (c) bond sites in pristine C<sub>60</sub>.

**Figure S2.** Optimized structures for a single Ca atom adsorbed on pristine C<sub>60</sub> on (a) pentagon, (b) hexagon sites in pristine C<sub>60</sub>. (c) The projected density of states of Ca atom in Ca-doped C<sub>60</sub> complex. The bond distances are in angstroms.

**Figure S1**

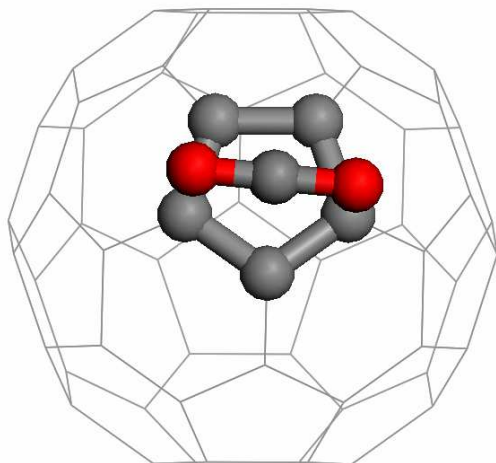

(a)

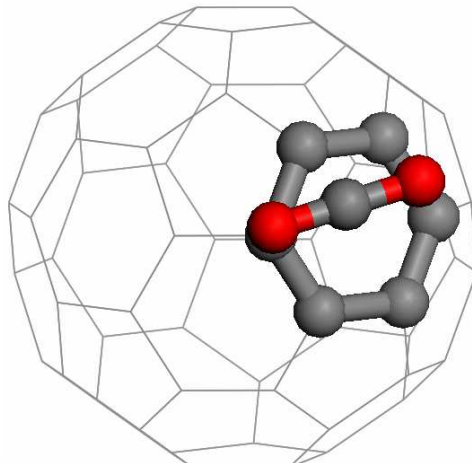

(b)

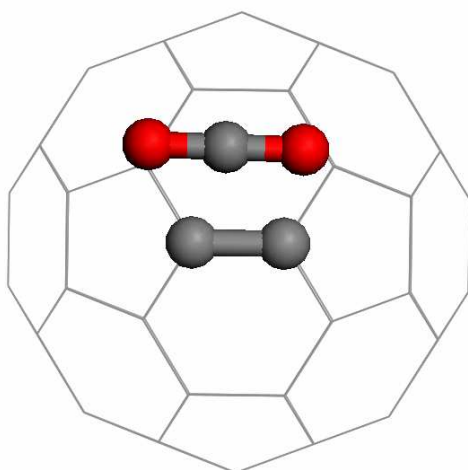

(c)

Figure S2

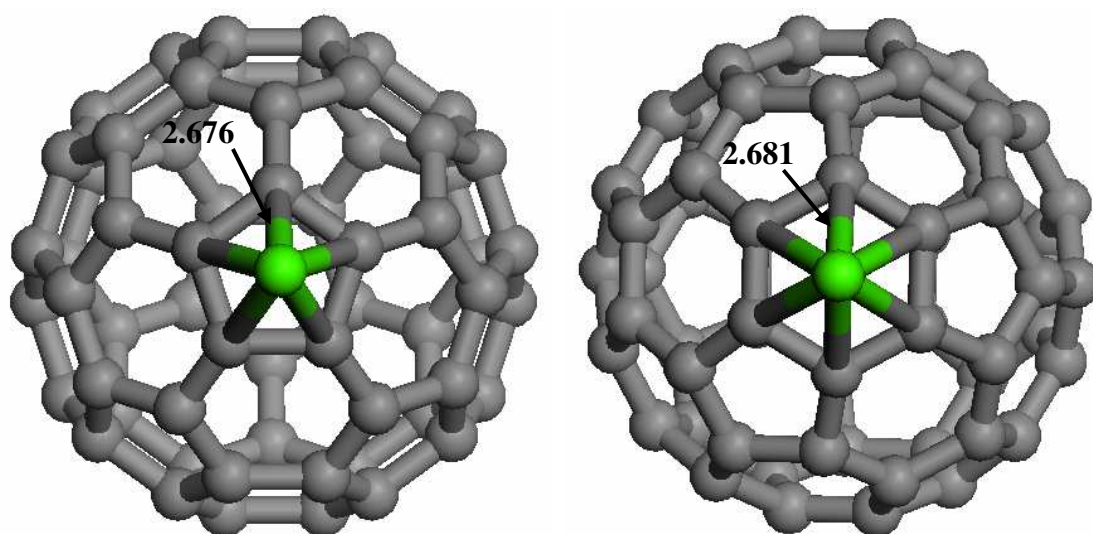

(a)  $E_{ads} = -1.487$  eV

(b)  $E_{ads} = -1.431$  eV

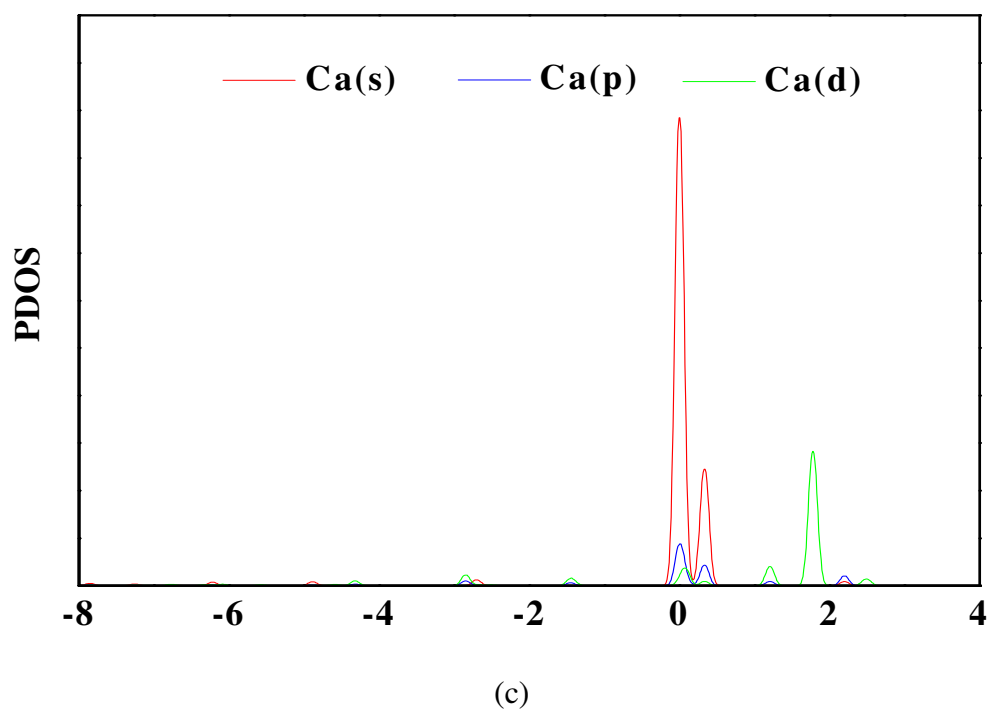

Supplement: Supplementary file 1 [file 4265869]
